# Supplementary material for: Cancer-Associated Fibroblasts in a 3D Engineered Tissue Model Induce Tumor-like Matrix Stiffening and EMT Transition
Source: MDPI journal article supplement (doi:10.3390/cancers14153810), 2022-08-05
Supplement: s1 [file s1]

## Supplementary Material

**Supplementary Table S1. Primer list**

| Genes  | Primers        | Sequences                 |
|--------|----------------|---------------------------|
| COL1A1 | Forward primer | AGGGACACAGAGGTTTCAGT      |
|        | Reverse primer | AGCACCATCATTTCACGAG       |
| FN1    | Forward primer | TCAGCTTCCTGGCACTTCTG      |
|        | Reverse primer | TCTTGTCTACATTTCGGCGG      |
| MMP2   | Forward primer | CTCTGGACTTAGACCGCTTGG     |
|        | Reverse primer | GAAGGTGTTTCAGGTATTGCATGTG |
| MMP9   | Forward primer | CGCAGACATCGTCATCCAGT      |
|        | Reverse primer | AACCGAGTTGGAACCACGAC      |

## Supplementary figures

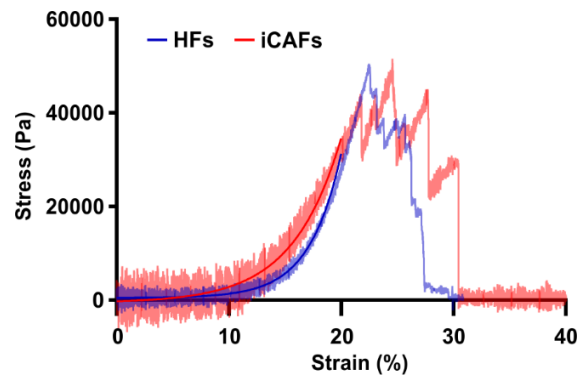

**Supplementary Figure S1. Representative stress-strain curves of HF-derived and iCAFs-derived ECM constructs during mechanical testing.** The solid lines represent the calculated fit over the toe region of each sample.

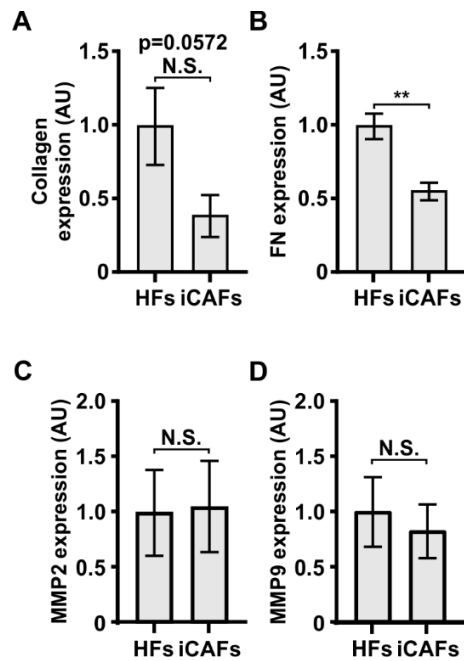

**Supplementary Figure S2. Impact of tumor cell mediated activation of fibroblasts on ECM and MMPs mRNA expression.** (A). RT-qPCR quantification of type I collagen expression in HF and iCAF cells on plastic. (B). RT-qPCR quantification of FN expression in HF and iCAF cells on plastic. (C). RT-qPCR quantification of MMP2 and (D). MMP9 expression in HF and iCAF cells on plastic. Data are presented as mean  $\pm$  SEM. \*\* $p < 0.01$ .

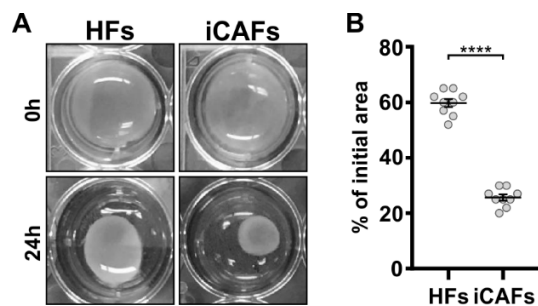

**Supplementary Figure S3. iCAFs exhibit increased collagen compaction.**

**A.** Representative images of collagen gel embedded with HF and iCAF cells at 0h and 24h. **B.** Corresponding quantification of the collagen gel compaction after 24h. N=4 independent biological replicates. The data are represented as mean  $\pm$  SEM. \*\*\*\* $p < 0.0001$ .
